# Supplementary figures and images for: Multiple sources of slow activity fluctuations in a bacterial chemosensory network
Source: eLife journal article supplement (doi:10.7554/elife.26796), 2017-12-12

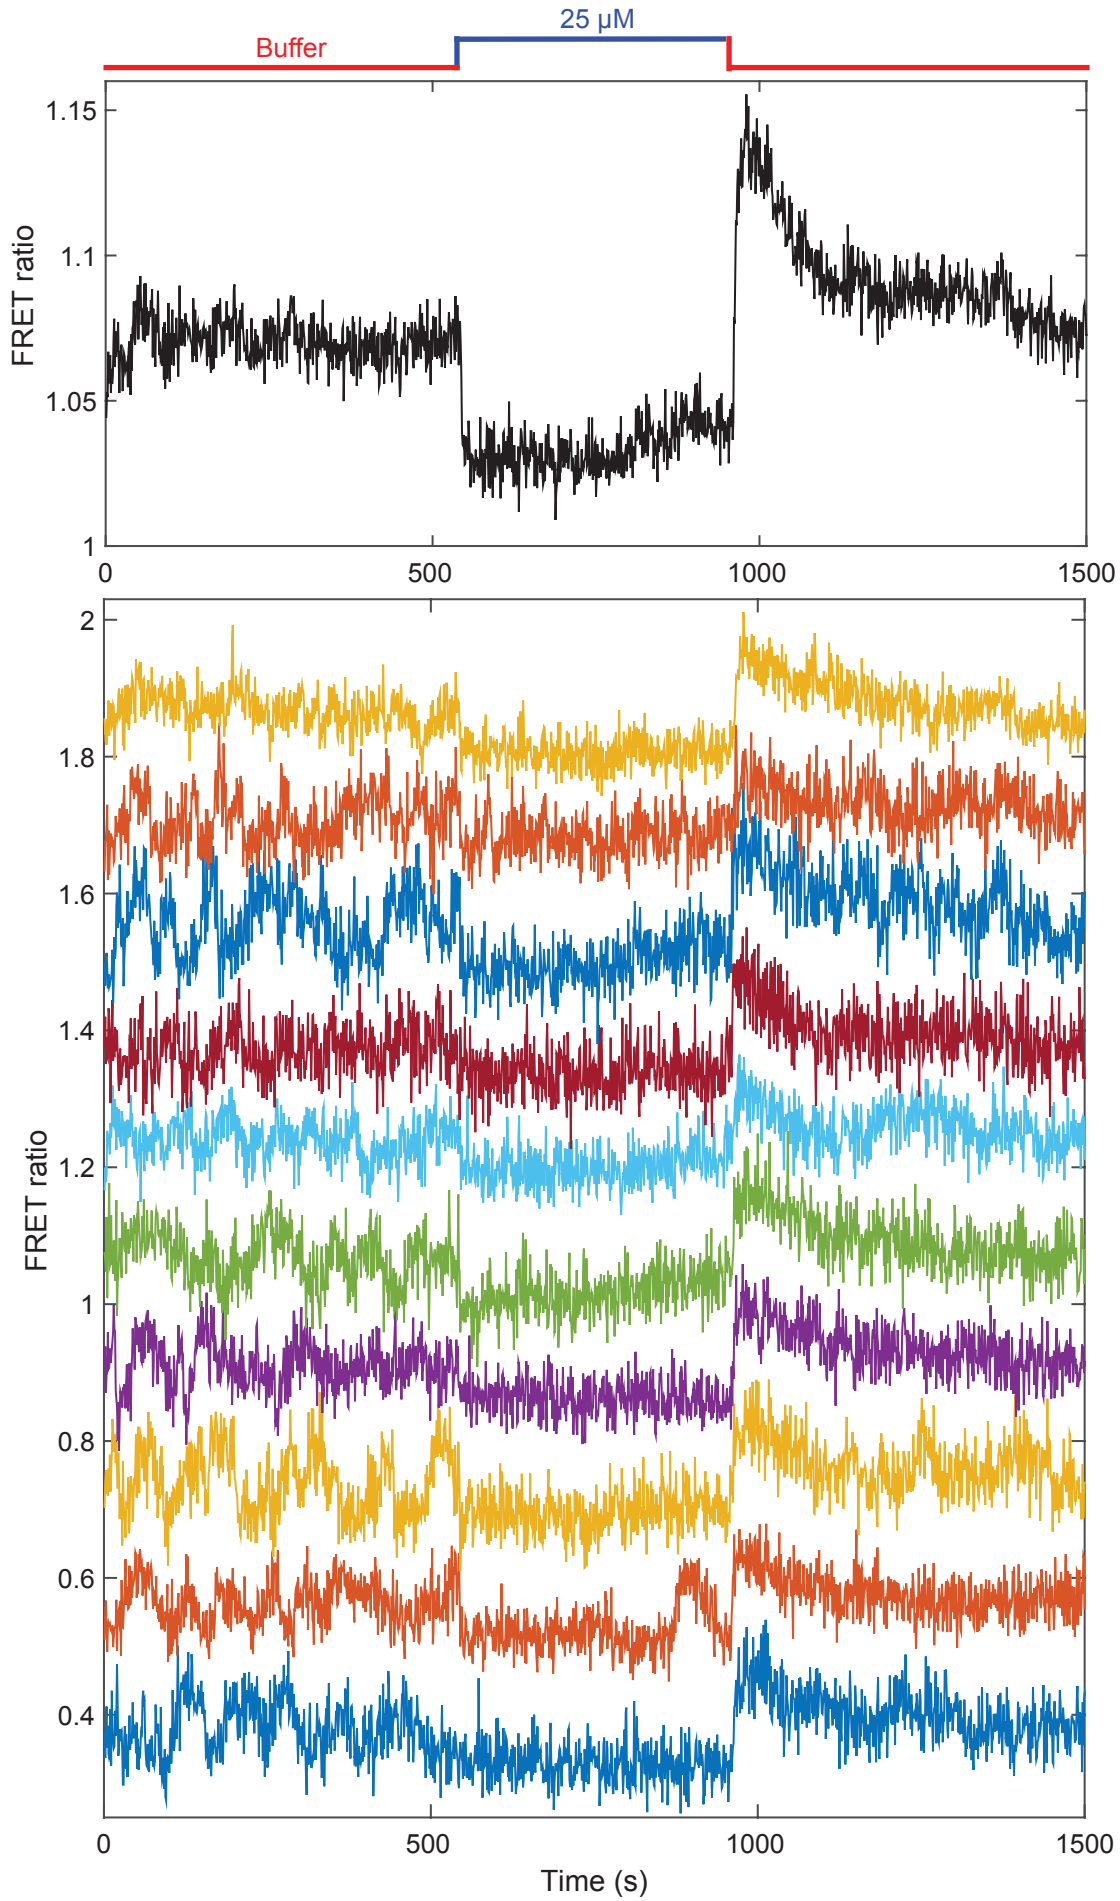

Supplement: supp [file elife_poa_e26796_Figure_1_figure_supplement_2.pdf › elife_poa_e26796_Figure_1_figure_supplement_2.pdf]

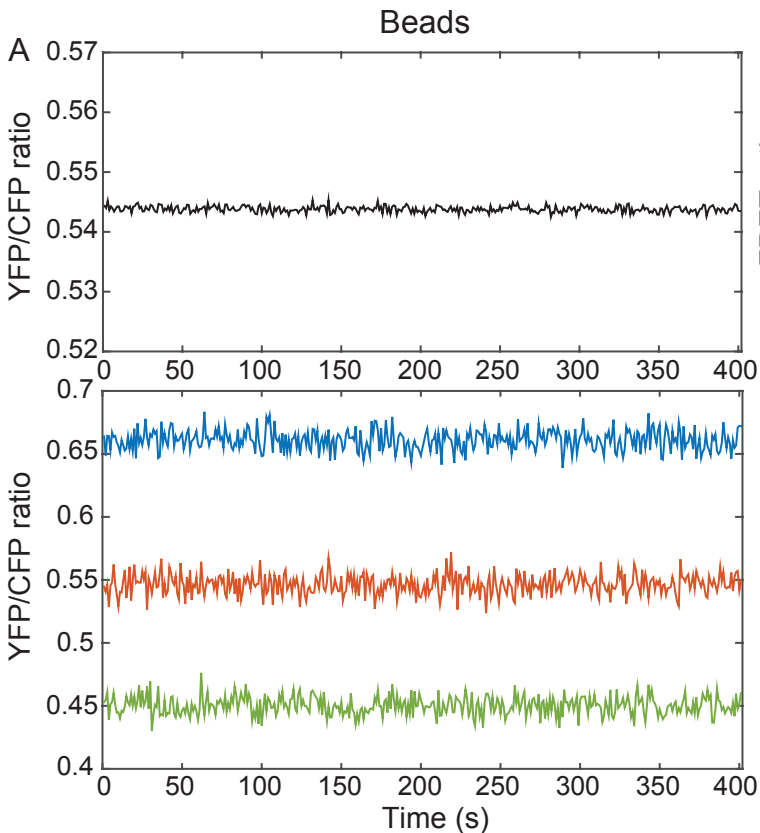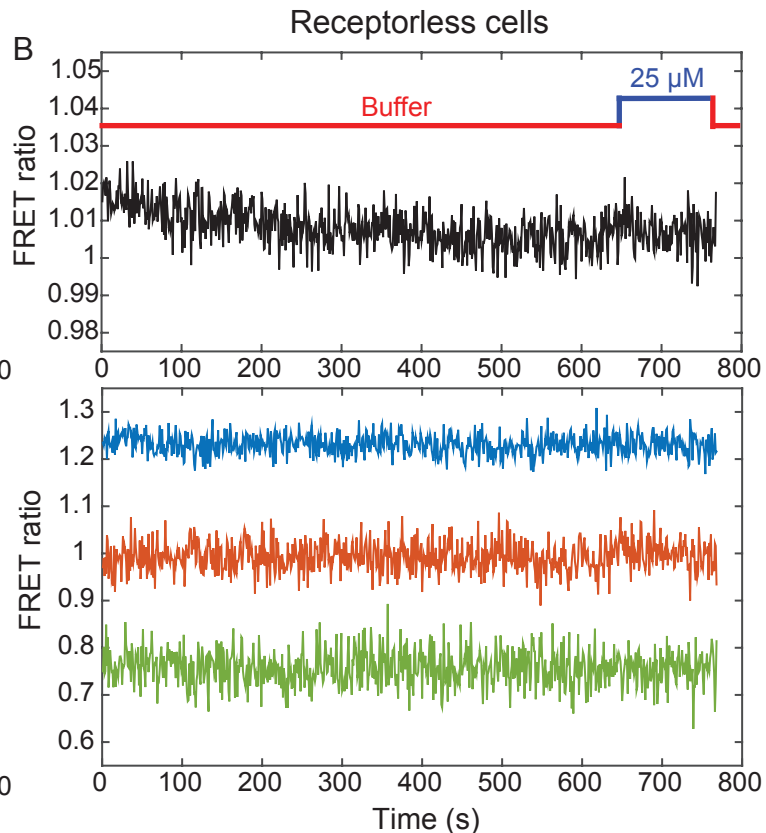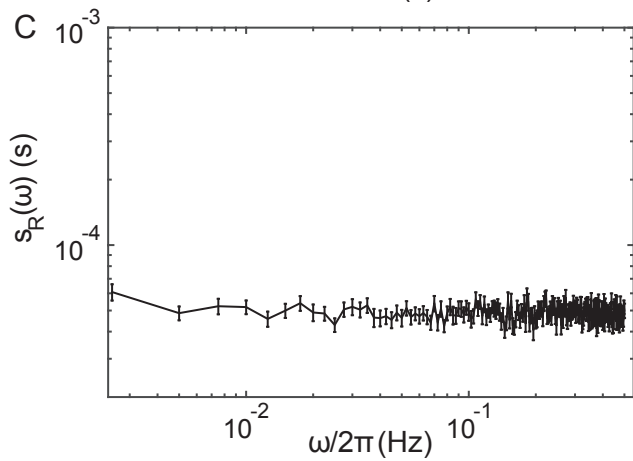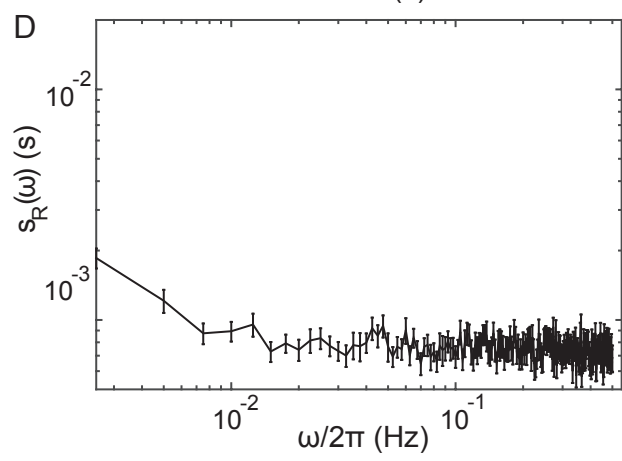

Supplement: supp [file elife_poa_e26796_Figure_1_figure_supplement_3.pdf › elife_poa_e26796_Figure_1_figure_supplement_3.pdf]

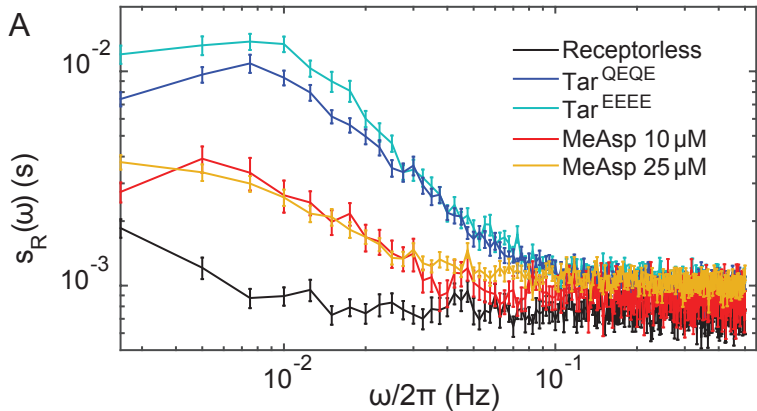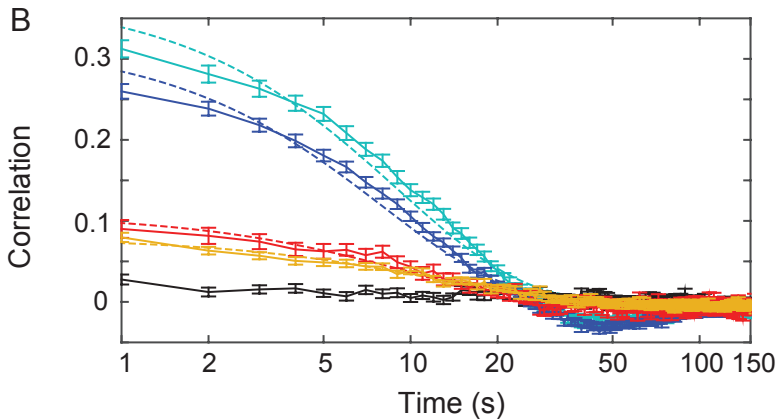

Supplement: supp [file elife_poa_e26796_Figure_1_figure_supplement_4.pdf › elife_poa_e26796_Figure_1_figure_supplement_4.pdf]

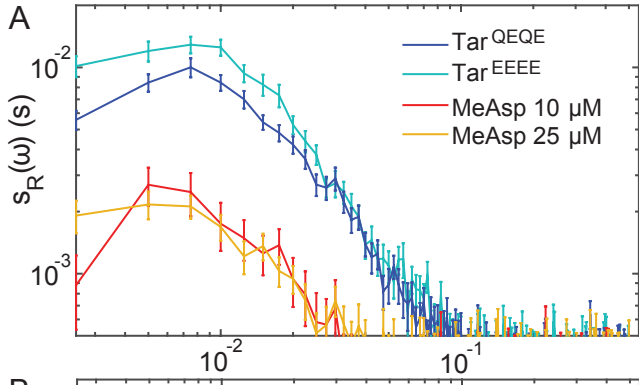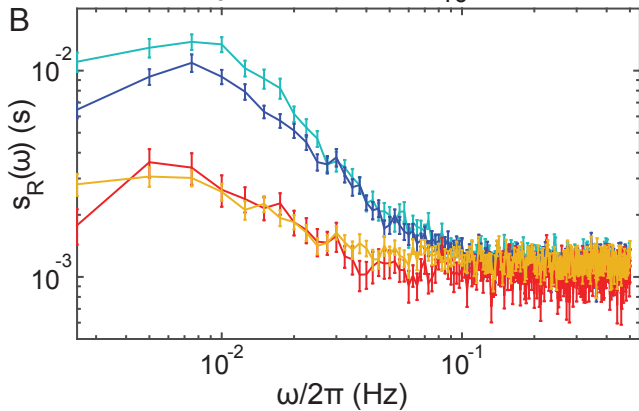

Supplement: supp [file elife_poa_e26796_Figure_1_figure_supplement_5.pdf › elife_poa_e26796_Figure_1_figure_supplement_5.pdf]

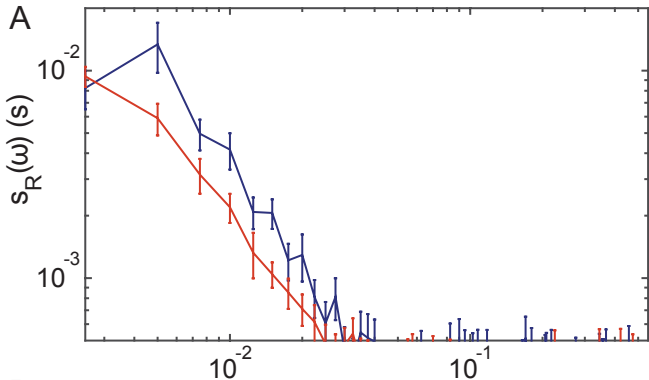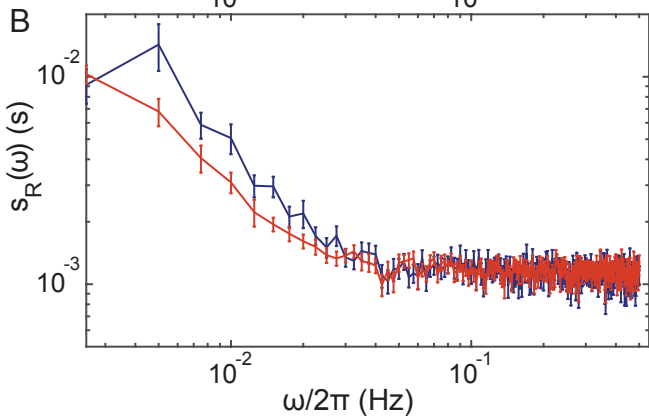

Supplement: supp [file elife_poa_e26796_Figure_2_figure_supplement_1.pdf › elife_poa_e26796_Figure_2_figure_supplement_1.pdf]

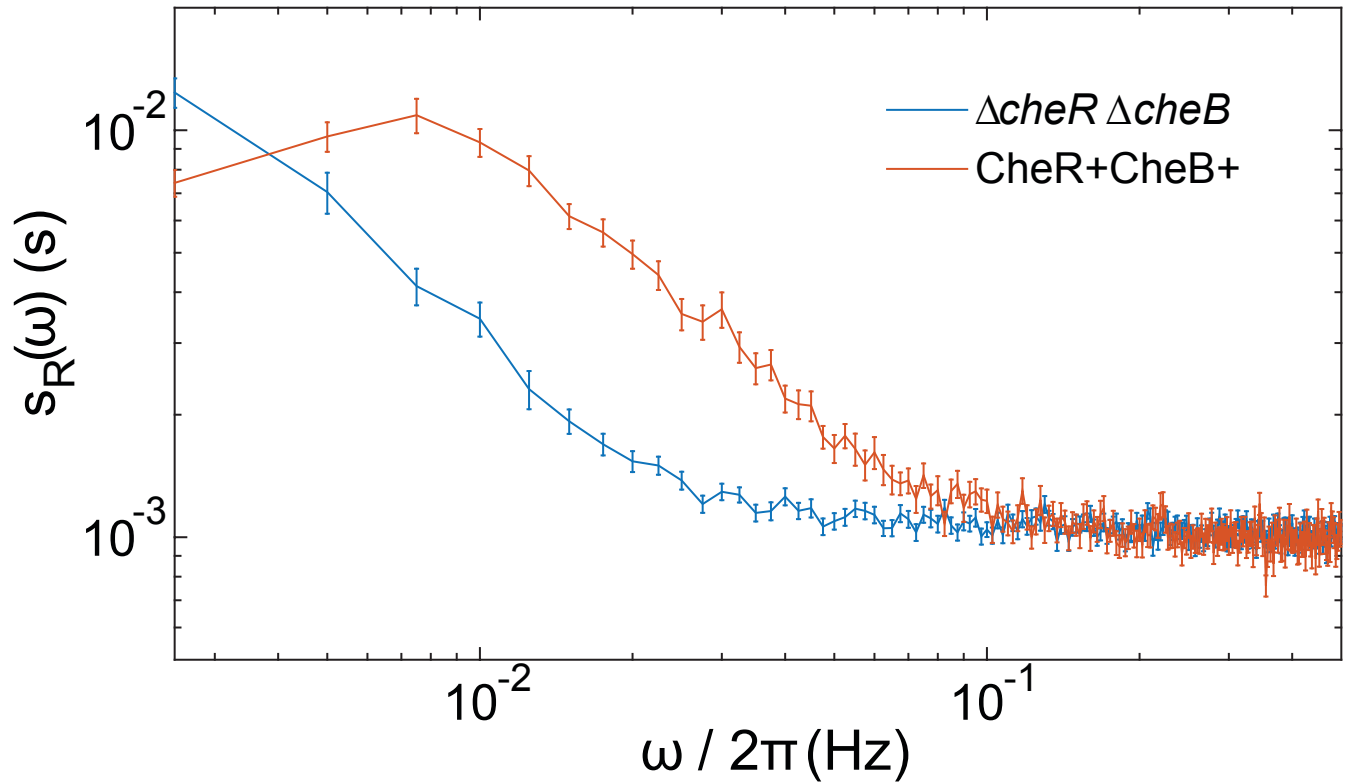

Supplement: supp [file elife_poa_e26796_Figure_2_figure_supplement_2.pdf › elife_poa_e26796_Figure_2_figure_supplement_2.pdf]

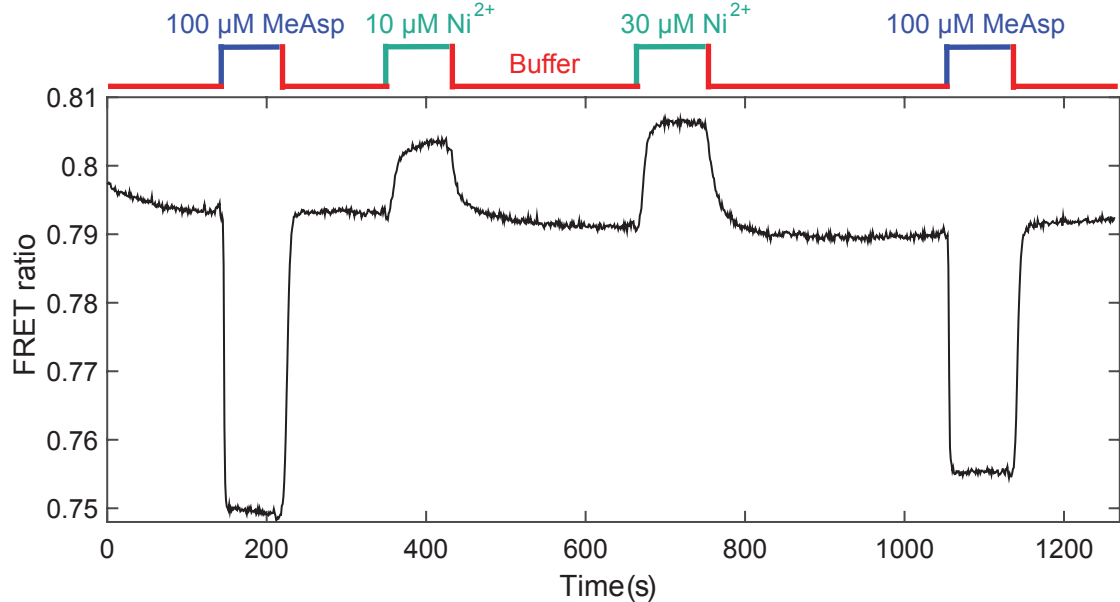

Supplement: supp [file elife_poa_e26796_Figure_3_figure_supplement_2.pdf › elife_poa_e26796_Figure_3_figure_supplement_2.pdf]

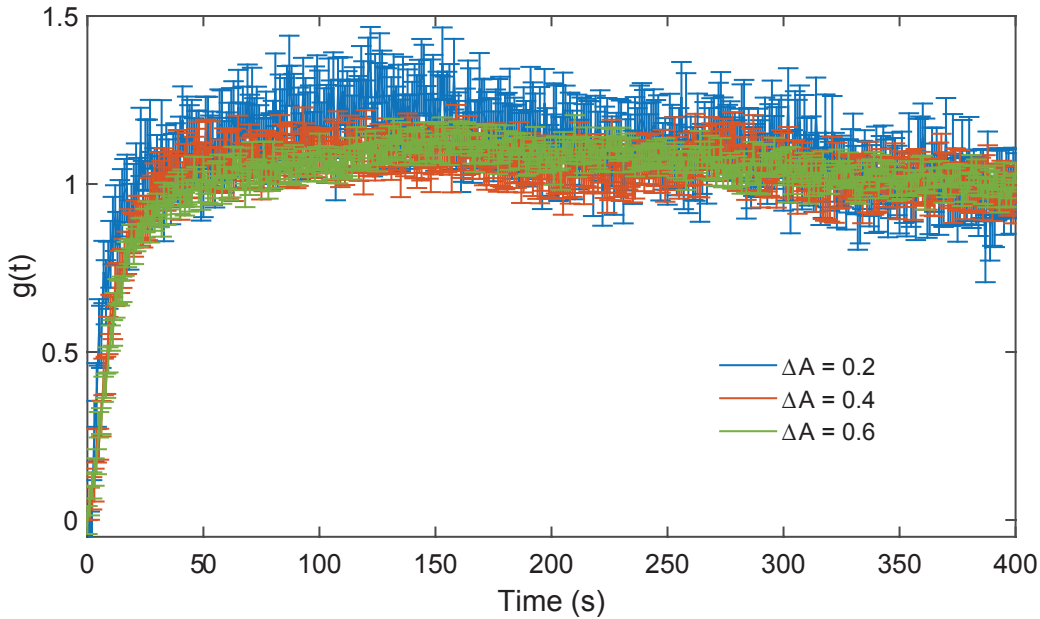

Supplement: supp [file elife_poa_e26796_Figure_4_figure_supplement_1.pdf › elife_poa_e26796_Figure_4_figure_supplement_1.pdf]

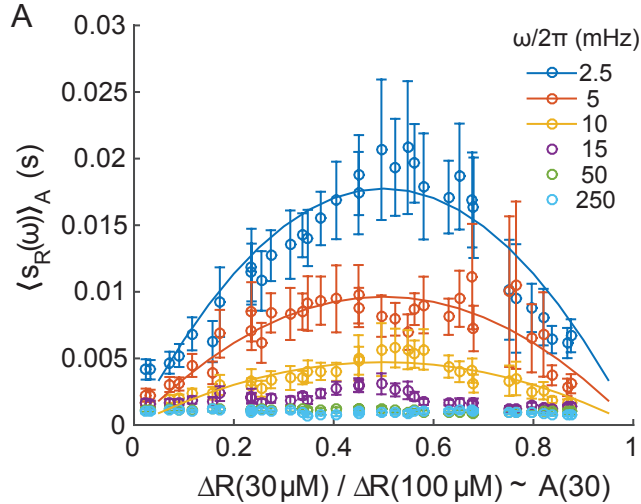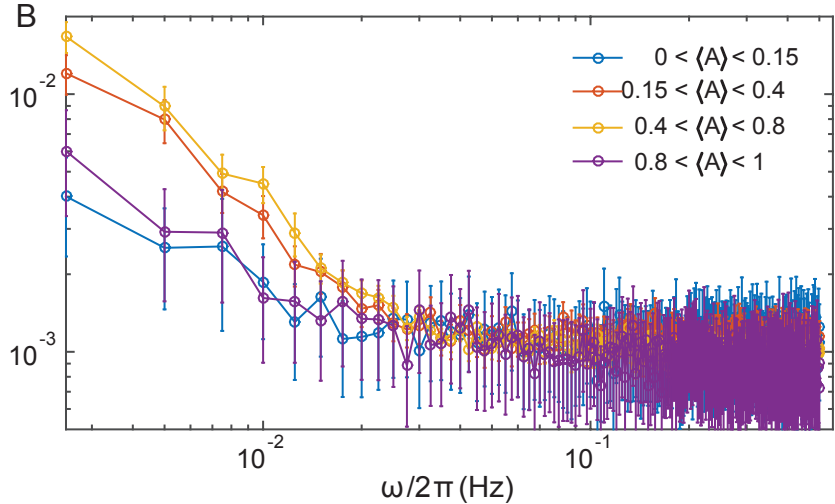

Supplement: supp [file elife_poa_e26796_Figure_4_figure_supplement_2.pdf › elife_poa_e26796_Figure_4_figure_supplement_2.pdf]

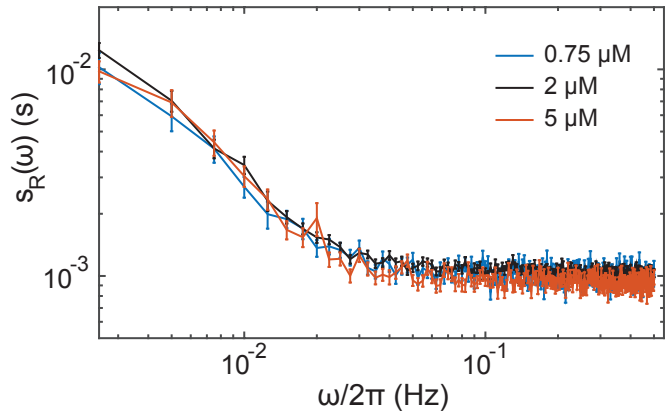

Supplement: supp [file elife_poa_e26796_Figure_4_figure_supplement_3.pdf › elife_poa_e26796_Figure_4_figure_supplement_3.pdf]

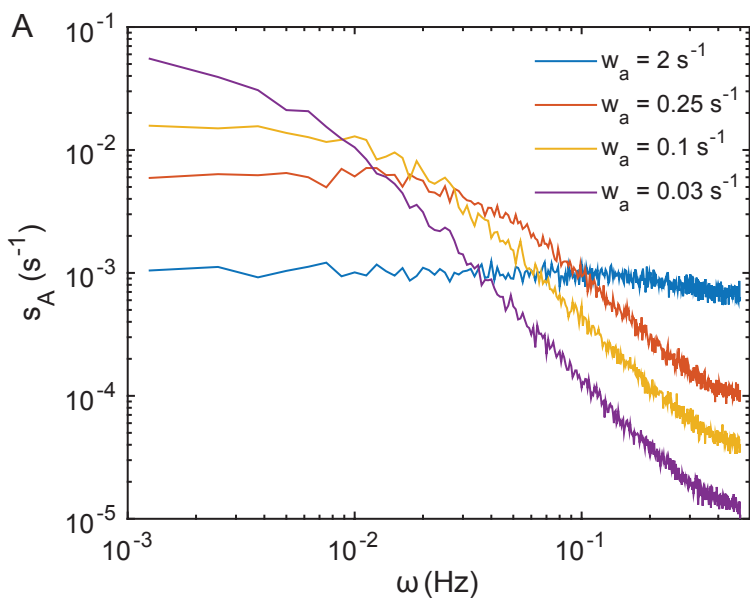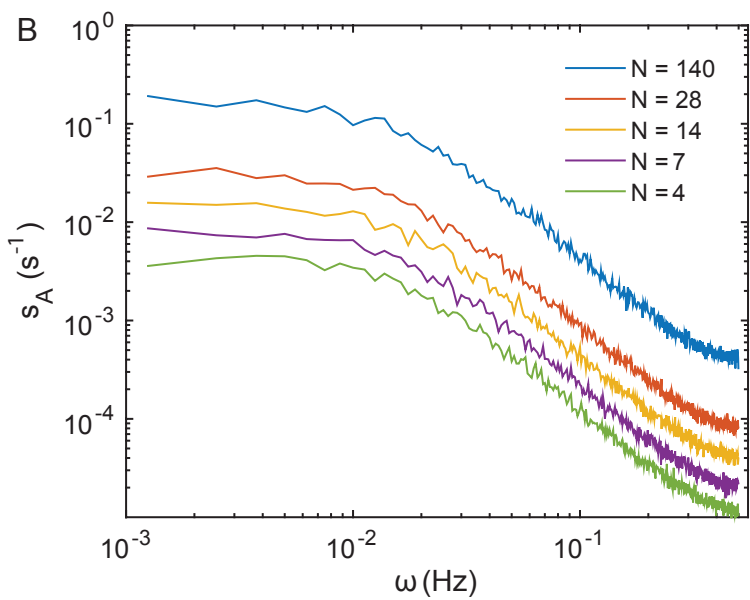

Supplement: supp [file elife_poa_e26796_Figure_4_figure_supplement_4.pdf › elife_poa_e26796_Figure_4_figure_supplement_4.pdf]

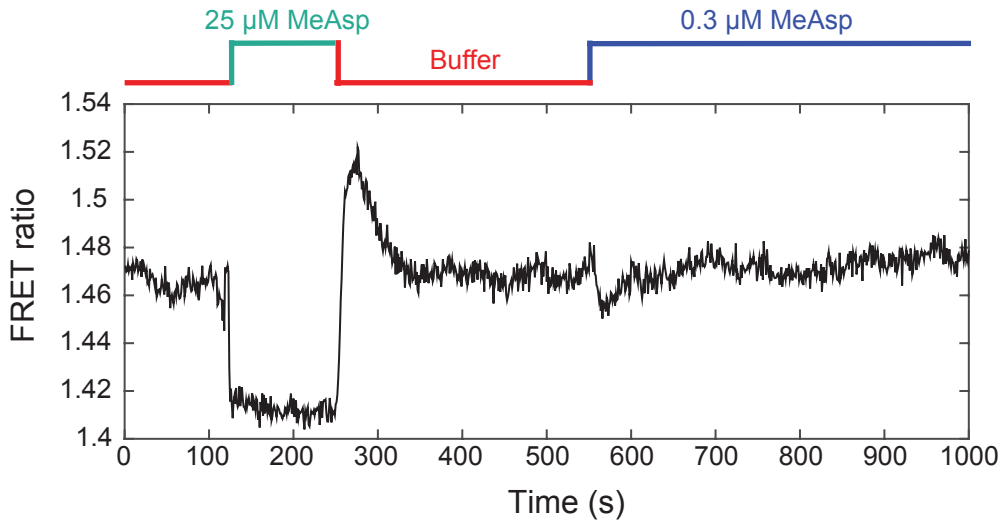

Supplement: supp [file elife_poa_e26796_Figure_4_figure_supplement_5.pdf › elife_poa_e26796_Figure_4_figure_supplement_5.pdf]

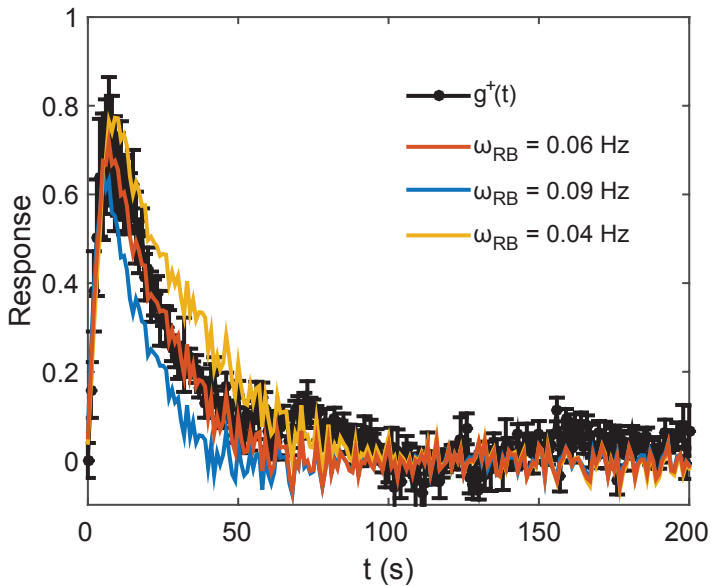

Supplement: supp [file elife_poa_e26796_Figure_4_figure_supplement_6.pdf › elife_poa_e26796_Figure_4_figure_supplement_6.pdf]

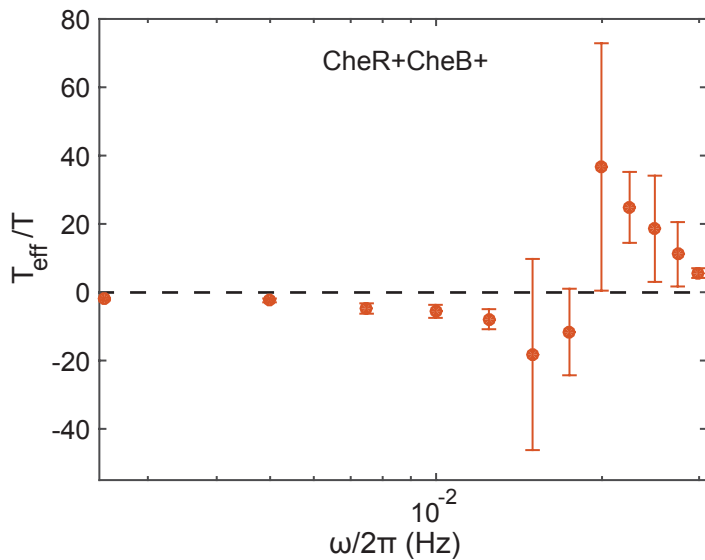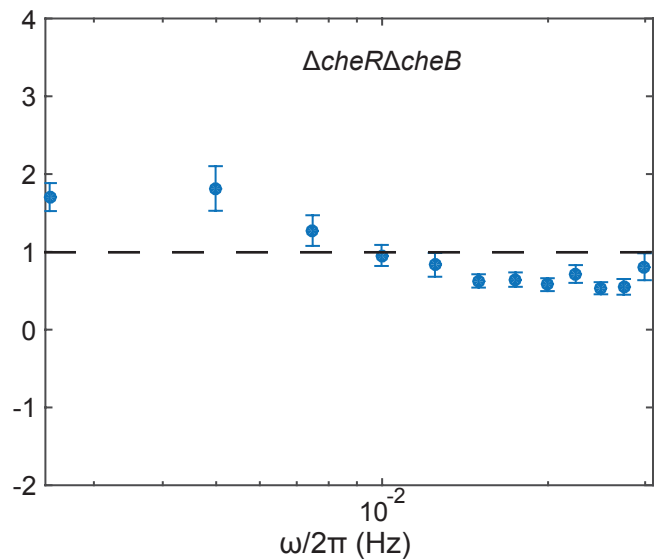

Supplement: supp [file elife_poa_e26796_Figure_4_figure_supplement_7.pdf › elife_poa_e26796_Figure_4_figure_supplement_7.pdf]
